# Supplementary material for: Aspergillus flavus Exploits Maize Kernels Using an “Orphan” Secondary Metabolite Cluster
Source: MDPI journal article supplement (doi:10.3390/ijms21218213), 2020-11-03
Supplement: s1 [file s1]

## SUPPLEMENTARY DATA

**Supplementary Figure S1.** *Aspergillus flavus* plates: a) AF3357, b) AFC-1, c) *Zn2Cys6-OE-GFP* and d) *Zn2Cys6Δ* at 7 days incubation on PDA

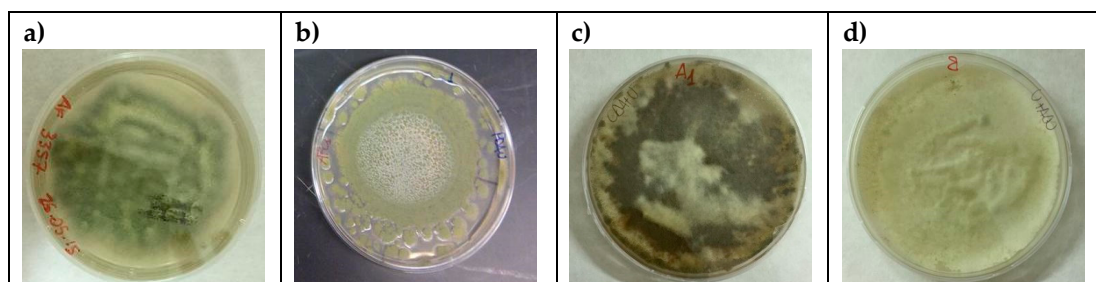

**Supplementary Figure S2.** *Aspergillus flavus* kernel assay: a) mock, b) AF3357, c) AFC-1, d) *Zn2Cys6-OE-GFP* and e) *Zn2Cys6Δ* at 7 days after inoculation on sterilized maize

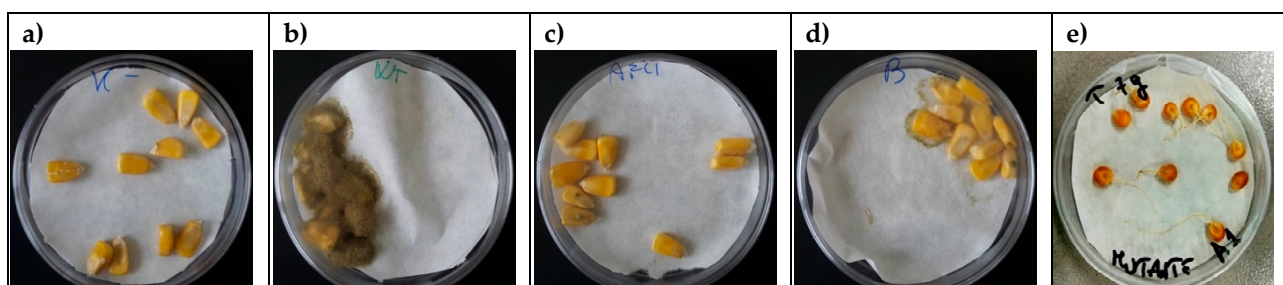

**Supplementary Figure S3.** Histological assay for mock-inoculated kernel (a) as well as kernel inoculated with *Zn2Cys6Δ* mutant at 2 dai (b) and 7 dai (c) without any apparent sign of infection.

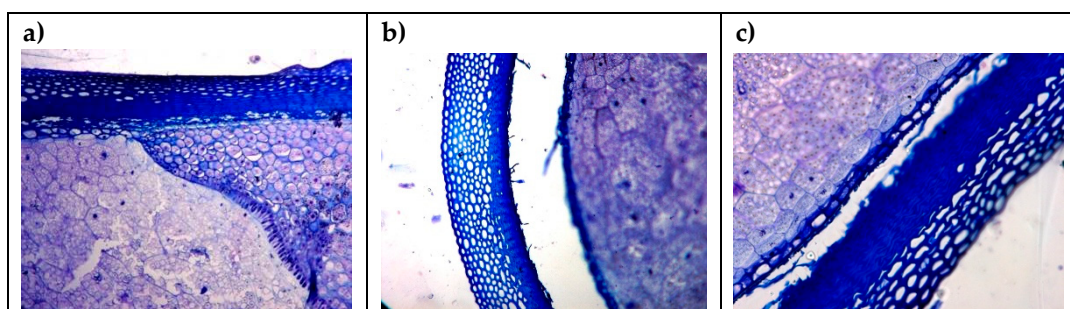

**Supplementary Figure S4.** TUNEL assay for mock-inoculated kernel (a) as well as kernel inoculated with *Zn2Cys6Δ* mutant at 2 dai (b) where it seems more pathogenic than its control (AFC-1) since the aleuronic layer is detached from the endosperm (a sign of plant stress). At 7 dai, the maize kernel did not show intercellular infection suggesting a slow infection process.

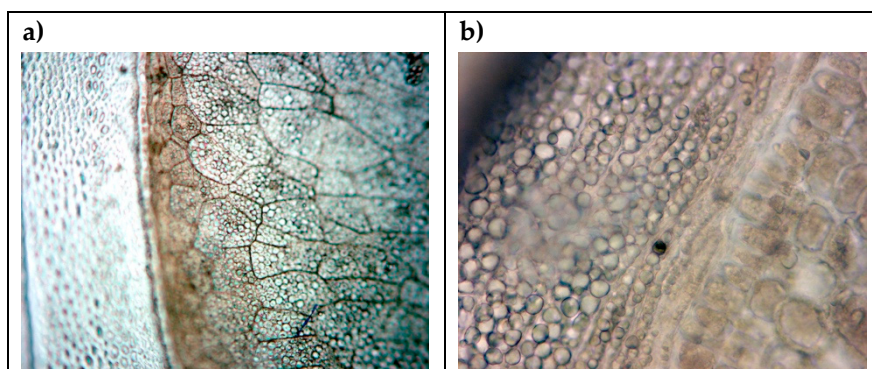

**Supplementary Table S5.** *A. flavus* can produce enzyme able to hydrolyze rutin through a putative presence of rutin-degrading enzyme (rutin oxidase) into quercetin. Then, the quercetin is degraded by the action of quercetin dehydrogenase (que dox) into 2-protocatechuoylphioroglucinol carboxylic acid. *A. flavus* 3357 grown in presence of rutin was analyzed by HPLC-MS/MS at 0 and 7 days after inoculation (dai). Rutin, quercetin and 2-protocatechuoylphioroglucinol carboxylic were detected.

|                             | rutin              | quercetin        | 2-protocatechuoylphioroglucinol carboxylic acid. |
|-----------------------------|--------------------|------------------|--------------------------------------------------|
| Relative abundance at 0 dai | 44593,79 ± 2658,25 | <LOD             | <LOD                                             |
| Relative abundance at 7 dai | 3768,30 ± 568,22   | 7628,50 ± 526,33 | 3625,45 ± 458,32                                 |

**Supplementary Table S6.** Primers used to generate the mutant strains.

| Primer name | Primer sequence 5'-3'        | Region amplified and its size | Aim of the set of primers                                                   |
|-------------|------------------------------|-------------------------------|-----------------------------------------------------------------------------|
| 5 U1        | TCAGTGAGGCTCGTGGTTTT         | 5 UTR 1558 amplicon size      | To assembly the three fragments for AFLA_096370 ( <i>Zn2Cys6</i> ) deletion |
| 5 U2        | AGATTTACGCCTTGGCTCCT         |                               |                                                                             |
| Arg FW      | AATTGCGGAGCAAATCACA          | argD 2356 amplicon size       |                                                                             |
| Arg Rev     | TTCCTCTGATGCAGGGATTC         |                               |                                                                             |
| 3 U1        | GACTAAGCCTCGCCCATTG          | 3 UTR 1491 amplicon size      |                                                                             |
| 3 U2        | TTGATCAGGCAAGGTCCTCG         |                               |                                                                             |
| 465 Fw      | CACCCGGATATCCTGACCTC         | 2515 amplicon size            | PCR to confirm the correct transformation in <i>Zn2Cys6</i> Δ mutant        |
| 3U4         | TTAATTAATTGATCAGGCAAGGTCCTCG |                               |                                                                             |
| 465 Fw      | CACCCGGATATCCTGACCTC         | 2515 amplicon size            |                                                                             |
| AfZn_P6     | TTGATCAGGCAAGGTCCTCG         |                               |                                                                             |
| 465 Fw      | CACCCGGATATCCTGACCTC         | 2484 amplicon size            |                                                                             |
| AfZn_P10    | CCATTCGTCCACCATTGCAT         |                               |                                                                             |
| ZnFW1       | GGGCCGAATCTTAATCGTCG         | 2771 amplicon size            | <i>Zn2Cys6</i> for overexpression construct                                 |
| ZnRev2      | ACATGAACACTGGGTAGCGA         |                               |                                                                             |

|            |                      |                                     |                            |
|------------|----------------------|-------------------------------------|----------------------------|
| AF_534 Fw  | GCGATGCAGAGAGAAGAAGC | <i>Zn2Cys6</i><br>534 amplicon size | Southern blotting<br>probe |
| AF_534 Rev | AGTATACGCCGAGTCAAGGG |                                     |                            |

**Supplementary Table S7.** RT-qPCR primers.

| Gene                     | Sequences              | Base pair          |
|--------------------------|------------------------|--------------------|
| Afbtub_fw (AFLA_068620)  | GTGACCACCTGTCTCCGTTT   | 211 amplicon size  |
| Afbtub_rev (AFLA_068620) | GGAAGTCAGAAGCAGCCATC   |                    |
| SalOHfw (AFLA_057780)    | TCGCTCCTCTCATCCATCAC   | 133 amplicon size  |
| SalOHrev (AFLA_057780)   | CGGAGCGGCAATTCACCTAA   |                    |
| NPP1fw (AFLA_096450)     | AAGACGAACAACCCACAACG   | 134 amplicon size  |
| NPP1rev (AFLA_096450)    | GGAAGAGACTCCCAGGCAAT   |                    |
| AF_QD_Fw (AFLA_096026)   | CATCCTCCGACTATGCGTTTAC | 124 amplicon size  |
| AF_QD_Rev(AFLA_096026)   | CTGGAAGCGACCCTTGAAAT   |                    |
| CMV_Fw                   | CGCAAATGGGCGGTAGGCGTG  | 3047 amplicon size |
| GFP_Rev                  | AATGGTCTGCTAGTTGAACGC  |                    |

**Supplementary Table S8.** Aflatoxin B1 quantification in the strains of *A. flavus* used in this study. Maize kernels infected with the strain specified in the table were extracted as indicated in the methods section at 7 dai.

| Strain                       | AFB1 quantification (ppb) |
|------------------------------|---------------------------|
| a) AF3357                    | 151.3 ± 10.2              |
| b) AFC-1                     | 85.2 ± 6.5                |
| c) <i>Zn2Cys6</i> -OE-GFP    | 138 ± 15.6                |
| d) <i>Zn2Cys6</i> Δ          | 125 ± 11.8                |
| e) <i>nepA</i> Δ-GUS B9-5    | 141.6 ± 20.5              |
| f) <i>nepA</i> -OE-GUS B5-12 | 184.3 ± 26.2              |
